# Supplementary material for: Electrochemical sandwich-type immunosensor for the detection of PSA based on a trimetallic AgAuPt nanocomposite synthesized using the galvanic replacement reaction
Source: Royal Society of Chemistry journal article supplement (doi:10.1039/d1ay01004b), 2021-01-01
Supplement: d1ay01004b1.pdf [file d1ay01004b1.pdf]

## Supplementary Information

### **Electrochemical sandwich-type immunosensor for detection of PSA based on trimetallic AgAuPt nanocomposite synthesized using galvanic replacement reaction**

Akbar Khanmohammadi <sup>a</sup>, Abbas Afkhami <sup>b</sup>, Ali Hajian <sup>c</sup>, Hosein Khoshshafar <sup>a</sup>, Hasan Bagheri <sup>d,\*</sup>

**Figures captions:**

**Fig. S1** Effect of incubation time of Ab<sub>1</sub> at the surface of GCE/AgAuPt

**Fig. S2** Effect of incubation time of BSA at the surface of GCE/AgAuPt/Ab<sub>1</sub>

**Fig. S3** Effect of incubation time of PSA at the surface of GCE/AgAuPt/Ab<sub>1</sub>/BSA

**Fig. S4** Effect of incubation time of Ab<sub>2</sub>-AgPt at the surface of GCE/AgAuPt/Ab<sub>1</sub>/BSA/PSA

**Fig. S5** Effect of H<sub>2</sub>O<sub>2</sub> concentration in the DPV response of the proposed GCE/AgAuPt/Ab<sub>1</sub>/BSA/PSA/Ab<sub>2</sub>-AgPt immunoassay in the PBS buffer (pH=7.4) containing 5.0 mM Fe(CN)<sub>6</sub><sup>3-</sup> as the redox probe

**Fig. S6** Stability of the as-prepared immunoassay studied in the 7, 14 and 21 days after fabrication

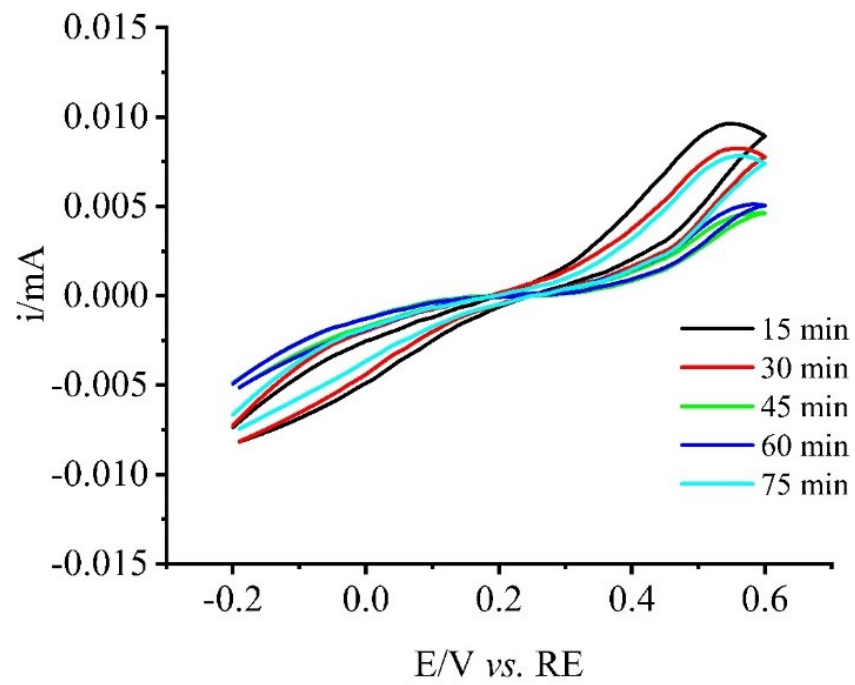

Fig. S1

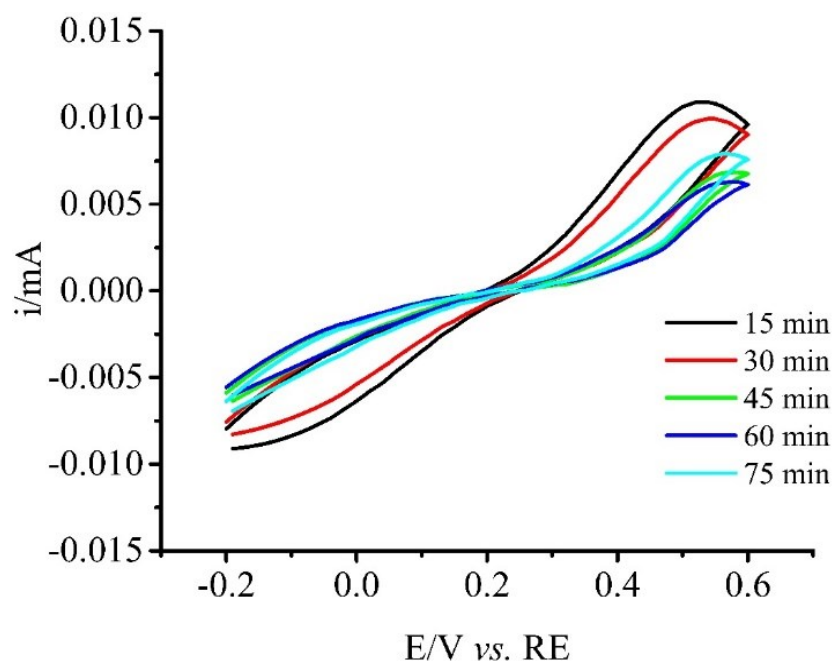

Fig. S2

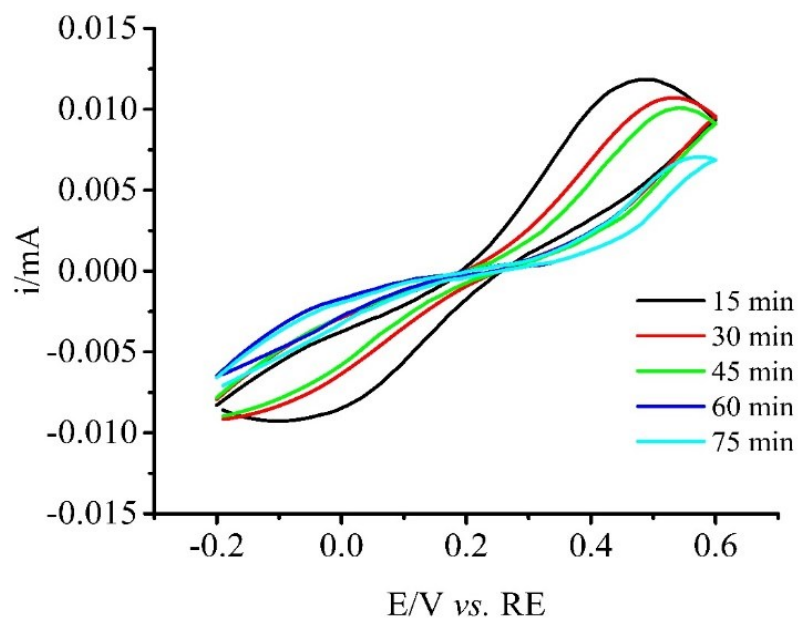

Fig. S3

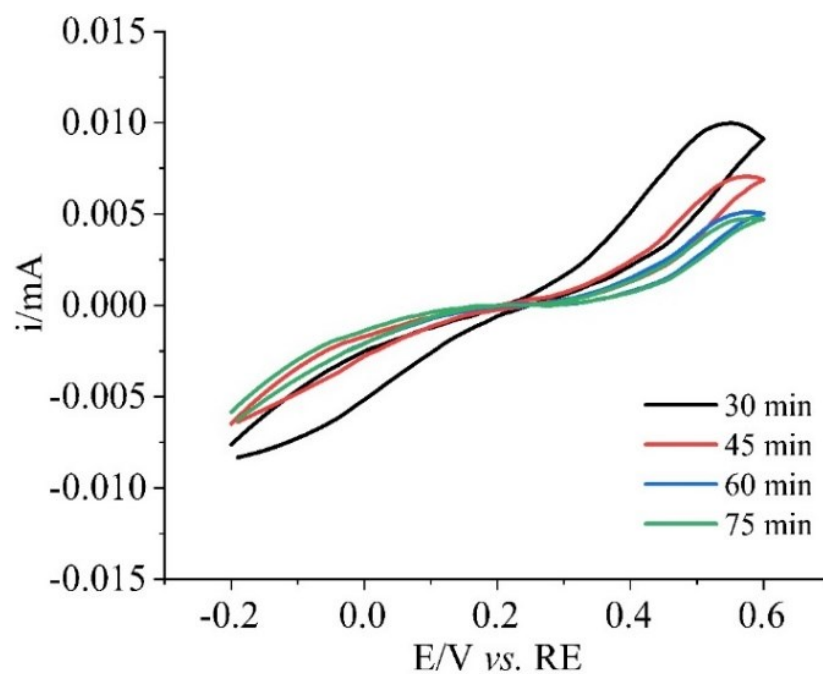

Fig. S4

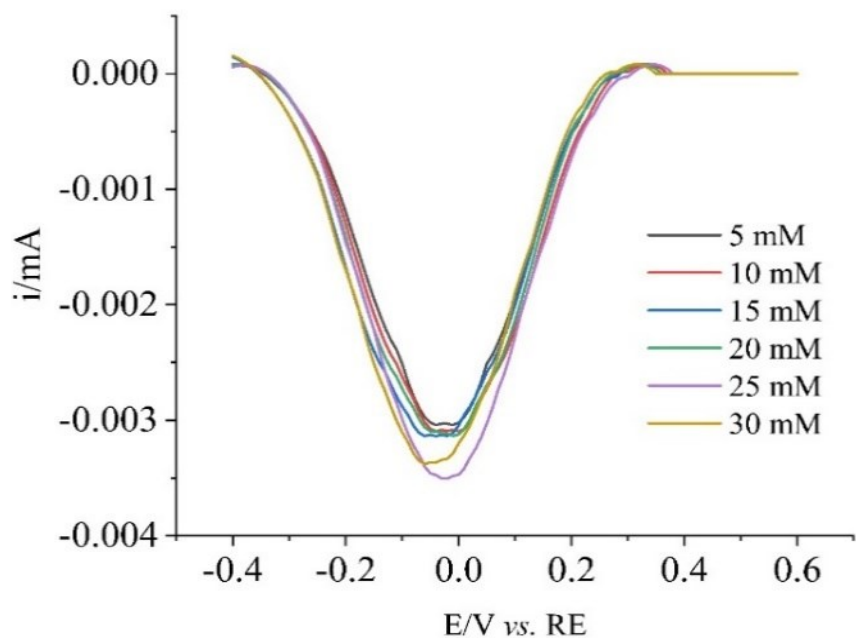

Fig. S5

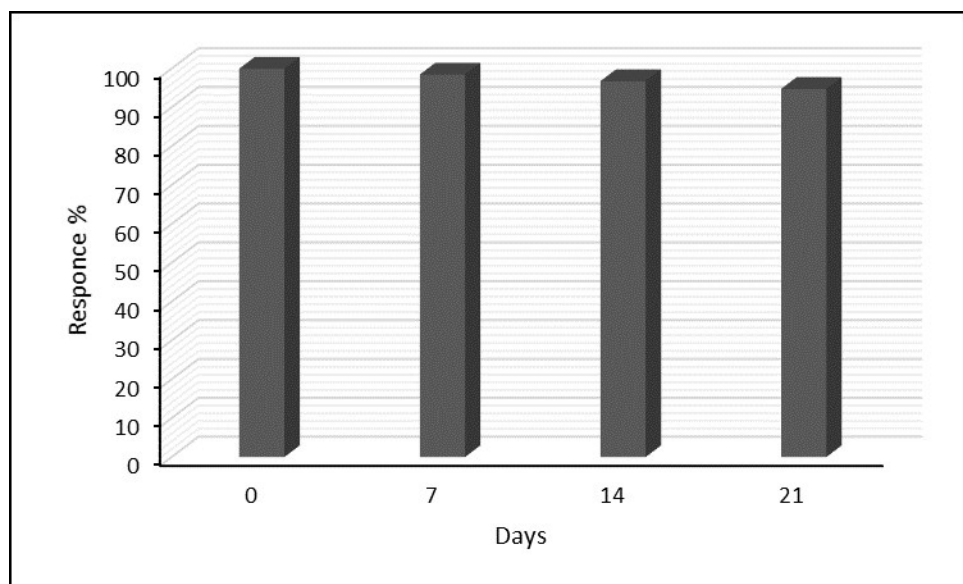

Fig. S6
